# Supplementary material for: The Influence of Overexpressed Fibroblast Growth Factor Receptors Towards Vitamin D Receptor Expression and Activity
Source: Preprints.org preprint supplement (doi:10.20944/preprints202110.0304.v1), 2021-10-21
Supplement: Supplementary file 1 [file supplementary]

**Table S1.** ***FOP2–FGFR1* fusion gene ORF cloned from KG1 cells**

|  |
| --- |
| ATGAGTTGCACAATTGAGAAGGCACTTGCCGACGCTAAAGCTCTTGTTGAAAGATTAAGAGATCATGACGATGCAGCAGAATCTCTGATTGAGCAAACCACAGCTCTCAACAAGCGAGTAGAAGCCATGAAACAGTATCAGGAAGAAATTCAAGAACTTAATGAAGTCGCGAGACATCGGCCACGGTCCACGTTAGTTATGGGAATCCAGCAAGAAAACAGACAAATCAGAGAGTTGCAACAAGAAAACAAAGAATTACGTACATCTCTGGAAGAACATCAGTCGGCCTTGGAACTTATAATGAGCAAGTACCGAGAACAAATGTTTAGATTGCTAATGGCTAGCAAAAAAGATGATCCGGGTATAATAATGAAGTTAAAAGAGCAGCACTCCAAGGTGTCTGCTGACTCCAGTGCATCCATGAACTCTGGGGTTCTTCTGGTTCGGCCATCACGGCTCTCCTCCAGTGGGACTCCCATGCTAGCAGGGGTCTCTGAGTATGAGCTTCCCGAAGACCCTCGCTGGGAGCTGCCTCGGGACAGACTGGTCTTAGGCAAACCCCTGGGAGAGGGCTGCTTTGGGCAGGTGGTGTTGGCAGAGGCTATCGGGCTGGACAAGGACAAACCCAACCGTGTGACCAAAGTGGCTGTGAAGATGTTGAAGTCGGACGCAACAGAGAAAGACTTGTCAGACCTGATCTCAGAAATGGAGATGATGAAGATGATCGGGAAGCATAAGAATATCATCAACCTGCTGGGGGCCTGCACGCAGGATGGTCCCTTGTATGTCATCGTGGAGTATGCCTCCAAGGGCAACCTGCGGGAGTACCTGCAGGCCCGGAGGCCCCCAGGGCTGGAATACTGCTACAACCCCAGCCACAACCCAGAGGAGCAGCTCTCCTCCAAGGACCTGGTGTCCTGCGCCTACCAGGTGGCCCGAGGCATGGAGTATCTGGCCTCCAAGAAGTGCATACACCGAGACCTGGCAGCCAGGAATGTCCTGGTGACAGAGGACAATGTGATGAAGATAGCAGACTTTGGCCTCGCACGGGACATTCACCACATCGACTACTATAAAAAGACAACCAACGGCCGACTGCCTGTGAAGTGGATGGCACCCGAGGCATTATTTGACCGGATCTACACCCACCAGAGTGATGTGTGGTCTTTCGGGGTGCTCCTGTGGGAGATCTTCACTCTGGGCGGCTCCCCATACCCCGGTGTGCCTGTGGAGGAACTTTTCAAGCTGCTGAAGGAGGGTCACCGCATGGACAAGCCCAGTAACTGCACCAACGAGCTGTACATGATGATGCGGGACTGCTGGCATGCAGTGCCCTCACAGAGACCCACCTTCAAGCAGCTGGTGGAAGACCTGGACCGCATCGTGGCCTTGACCTCCAACCAGGAGTACCTGGACCTGTCCATGCCCCTGGACCAGTACTCCCCCAGCTTTCCCGACACCCGGAGCTCTACGTGCTCCTCAGGGGAGGATTCCGTCTTCTCTCATGAGCCGCTGCCCGAGGAGCCCTGCCTGCCCCGACACCCAGCCCAGCTTGCCAATGGCGGACTCAAACGCCGCTGA |

1 The 5’ and 3’ ends of *FOP2–FGFR1* fusion gene in KG1 cells were determined using SMARTer® RACE 5’/3’ Kit from Takara Bio (Japan). Then the full ORF of the fusion gene was amplified and sequenced.
